# Supplementary material for: Organically templated chained chlorocadmates and cadmium-chloro thiocyanates
Source: Royal Society of Chemistry journal article supplement (doi:10.1039/b817781c), 2009-01-01
Supplement: b817781c.pdf [file b817781c.pdf]

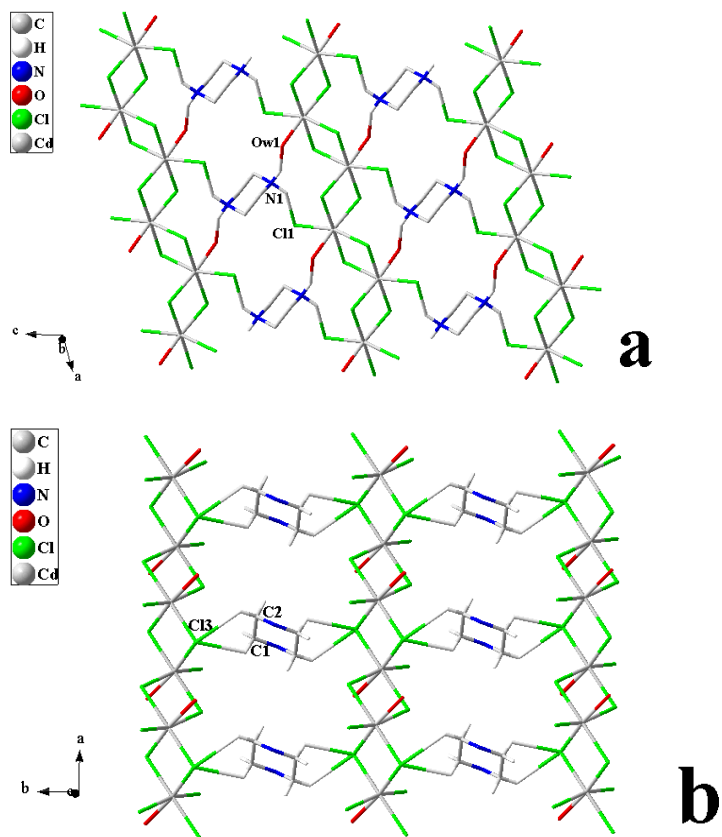

Fig. S1 The 2-D hydrogen-bonded layers in *ac* plane self-assembled by N-H...Cl and N-H...Ow hydrogen bonds (a) and in *ab* plane self-assembled by C-H...Cl hydrogen bonds (b) in compound 1.

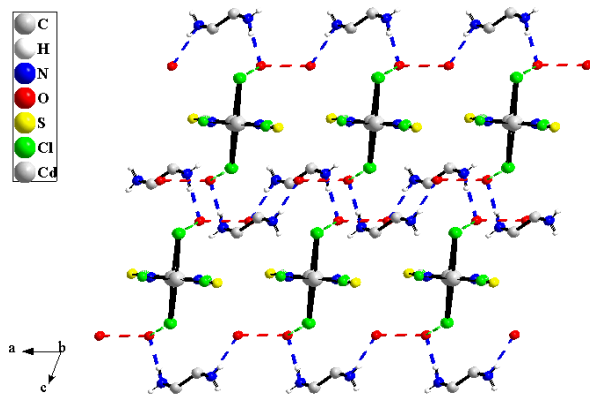

Fig. S2 The 3-D supramolecular network in (010) direction in compound 3.

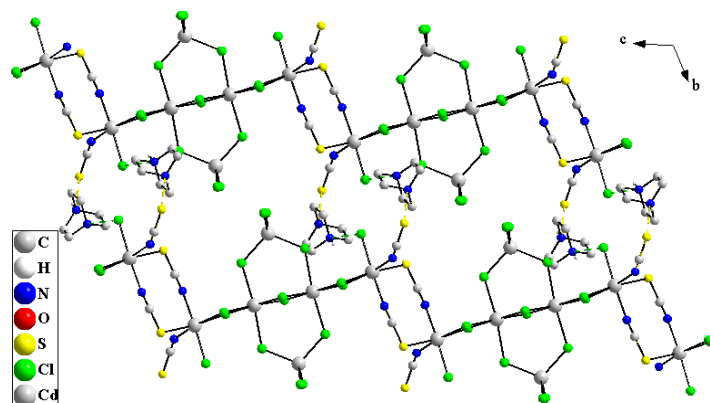

**Fig. S3** The 2-D supramolecular network of compound **4** (the dabco molecules used to provide the charge balance are omitted for clarity).

**Table S1** A summary of bond distance variations (Å)

|                                      | Compound 1                                                                           | Compound 2                                                                                                                 | Compound 3                               | Compound 4                                                                                                                         |
|--------------------------------------|--------------------------------------------------------------------------------------|----------------------------------------------------------------------------------------------------------------------------|------------------------------------------|------------------------------------------------------------------------------------------------------------------------------------|
| Cd-N                                 |                                                                                      |                                                                                                                            | Cd-N3=2.291(4)                           | Cd-N5=2.435(4)<br>Cd-N6=2.270(4)                                                                                                   |
| Cd-S                                 |                                                                                      |                                                                                                                            | Cd-S=2.7460(12)                          | Cd-S#1=2.7952(16)                                                                                                                  |
| Cd-Ow                                | Cd-Ow=2.453(3)                                                                       |                                                                                                                            |                                          |                                                                                                                                    |
| Cd <sub>o</sub> -Cl(t)               | Cd-Cl1=2.5438(13)                                                                    | Cd1-Cl1=2.5087(7)<br>Cd2-Cl6=2.4920(9)                                                                                     | Cd-Cl1=2.5949(12)<br>Cd-Cl2=2.6024(12)   | Cd1-Cl1=2.5404(13)                                                                                                                 |
| Cd <sub>o</sub> -Cl(μ <sub>2</sub> ) | Cd-Cl3#1=2.5894(11)<br>Cd-Cl3=2.6199(12)<br>Cd-Cl2#2=2.6468(12)<br>Cd-Cl2=2.6646(12) | Cd1-Cl2=2.6193(9)<br>Cd1-Cl4=2.6644(8)<br>Cd2-Cl2#2=2.5869(8)<br>Cd2-Cl4=2.6263(7)                                         | Cd-Cl3=2.7038(10)<br>Cd-Cl3#1=2.7157(10) | Cd1-Cl2=2.6728(16)<br>Cd1-Cl3=2.7017(14)<br>Cd2-Cl3=2.5875(15)<br>Cd2-Cl5=2.6998(17)<br>Cd2-Cl5#2=2.6212(15)<br>Cd2-Cl2=2.6278(13) |
| Cd <sub>o</sub> -Cl(μ <sub>3</sub> ) |                                                                                      | Cd1-Cl3#1=2.6100(7)<br>Cd1-Cl3=2.6244(7)<br>Cd1-Cl5=2.9152(9)<br>Cd2-Cl5#3=2.6173(8)<br>Cd2-Cl5=2.6331(8)<br>Cd2-Cl3=3.117 |                                          | Cd2-Cl4=2.7482(14)<br>Cd2-Cl6#2=2.7545(14)                                                                                         |
| Cd <sub>i</sub> -Cl                  |                                                                                      |                                                                                                                            |                                          | Cd3-Cl7=2.4306(14)<br>Cd3-Cl8=2.4611(14)<br>Cd3-Cl6=2.4804(17)<br>Cd3-Cl4=2.4860(12)                                               |

Symmetry transformations used to generate equivalent atoms: #1 -x, -y+1, -z #2 -x+1, -y+1, -z for **1**; #1 -x+1, -y+1, -z #2 x+1, y, z #3 -x+2, -y+1, -z for **2**; #1 -x+1, -y+2, -z+1 for **3**; #1 -x-1, -y+1, -z+1 #2 -x-1, -y+1, -z for **4**;

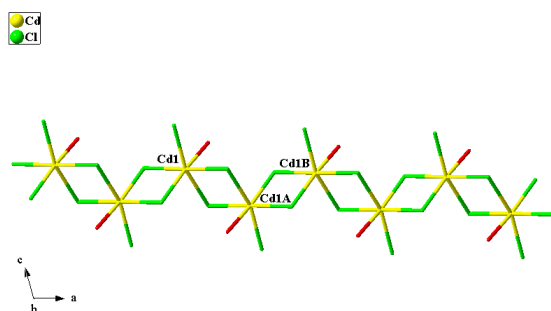

Fig. S4 The 1-D  $[\text{Cd}_2\text{Cl}_6(\text{H}_2\text{O})_2]^{2-}$  chain in compound **1** extending in the *a*-direction.

As shown in Figure S4, Cd1A is obtained from Cd1 by an inversion center, and Cd1B is obtained by the translation of Cd1 along *a* direction.

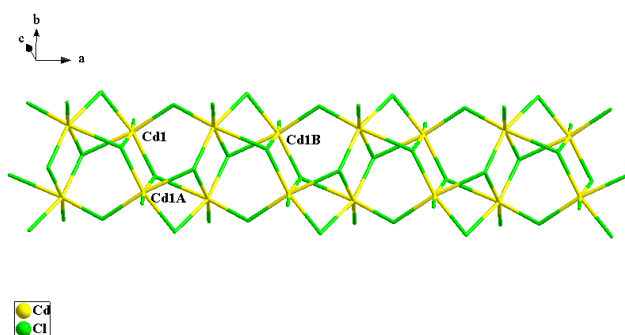

Fig. S5 The 1-D  $[\text{Cd}_2\text{Cl}_6]^{2-}$  chain in compound **2** extending in the *a*-direction.

As shown in Figure S5, Cd1A is obtained from Cd1 by an inversion center, and Cd1B is obtained by the translation of Cd1 along *a* direction.

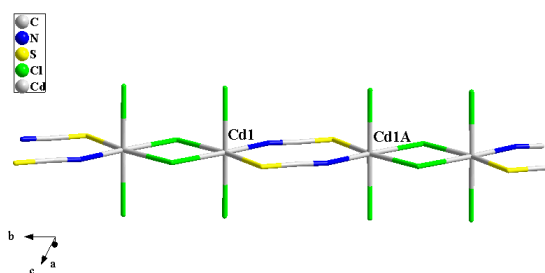

Fig. S6 The 1-D  $[\text{CdCl}_3(\text{SCN})]^{2-}$  chain in compound **3** extending in the *b*-direction.

As shown in Figure S6, Cd1A is obtained from Cd1 by an inversion center along *b* direction.

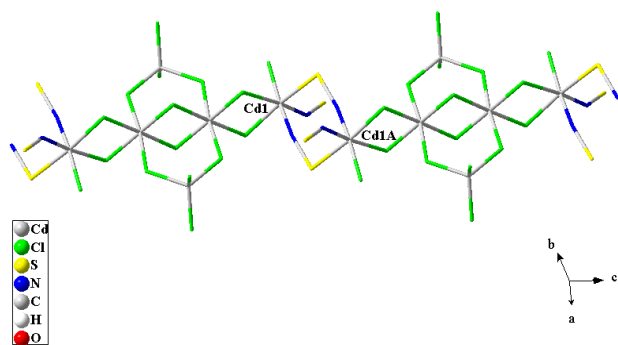

Fig. S7 The 1-D  $[\text{Cd}_3\text{Cl}_8(\text{SCN})_2]^{4+}$  chain in compound **4** extending in the  $c$ -direction.

As shown in Figure S7, Cd1A is obtained from Cd1 by an inversion center along  $c$  direction.
